# Supplementary material for: High Temperature Tolerant Mid-Wavelength Infrared Avalanche Photodiodes with Separated Fully-depleted Absorption, Multiplication Region
Source: Research Square preprint supplement (doi:10.21203/rs.3.rs-5711150/v1), 2025-01-10
Supplement: Supplementary file 1 [file 6f85992cee3e52fc0c60e182.docx]

Supplementary information


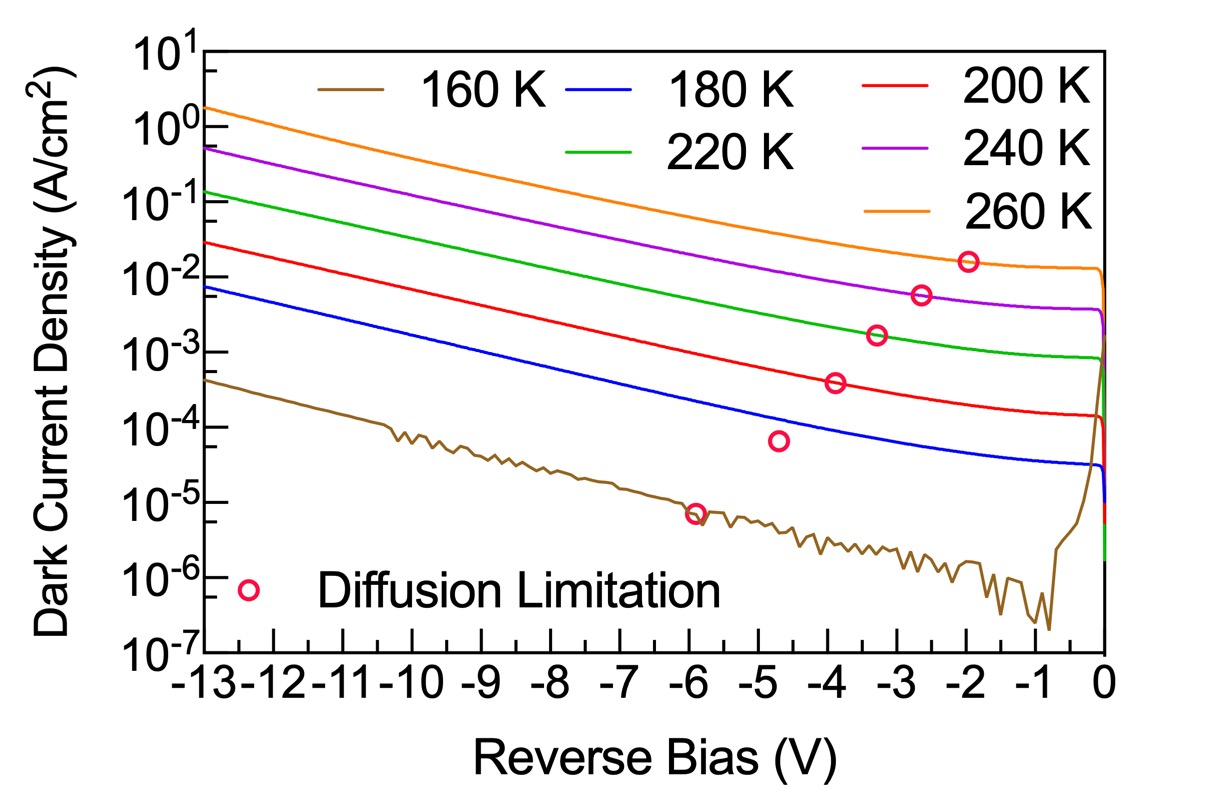


Fig. S1. Temperature dependent dark current of the MWIR SFDAM APDs.


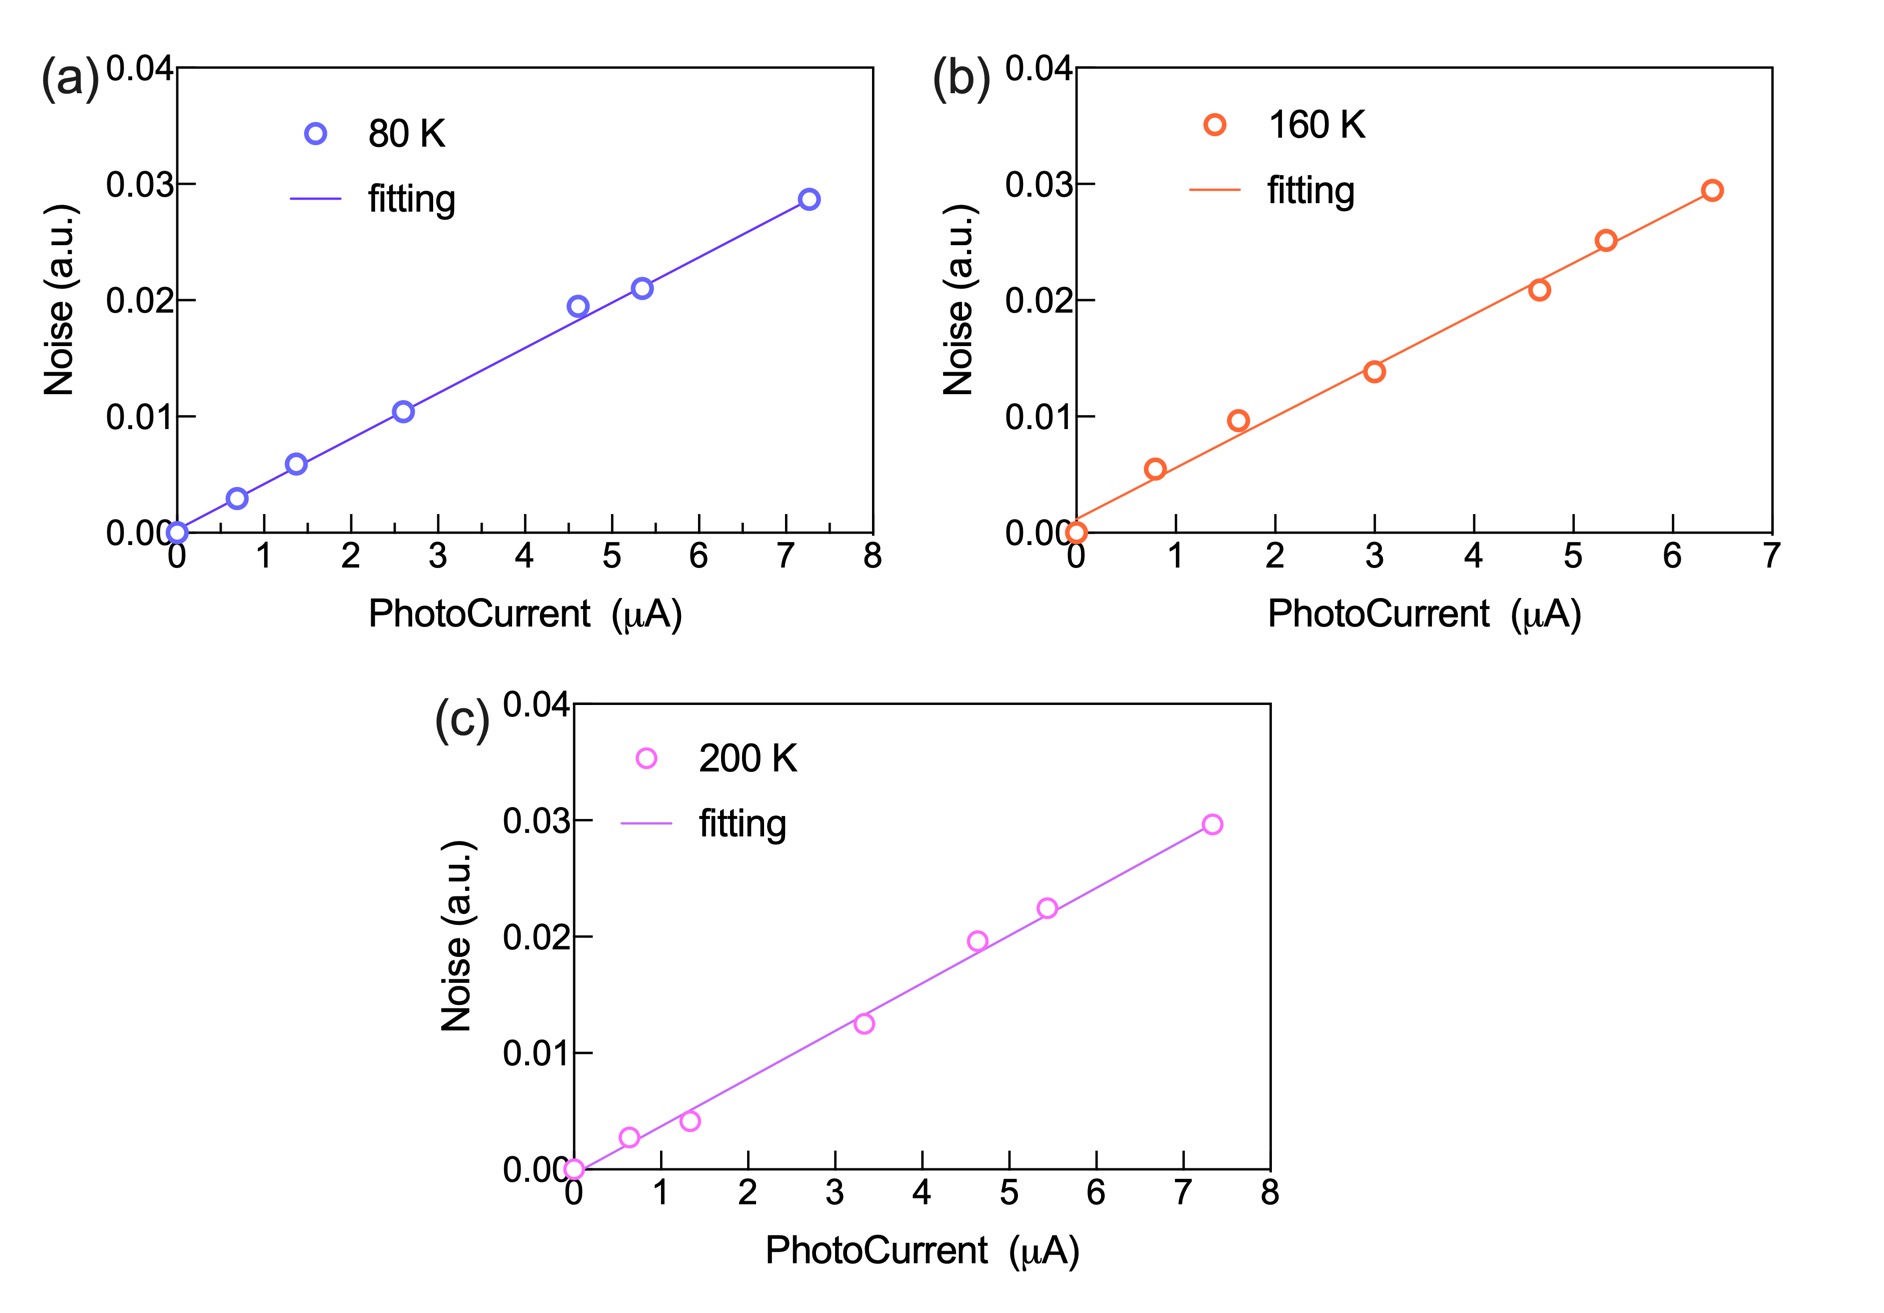


Fig. S2. linear fitting of the photocurrent and noise at unit gain bias at different temperature for SFDAM APDs.


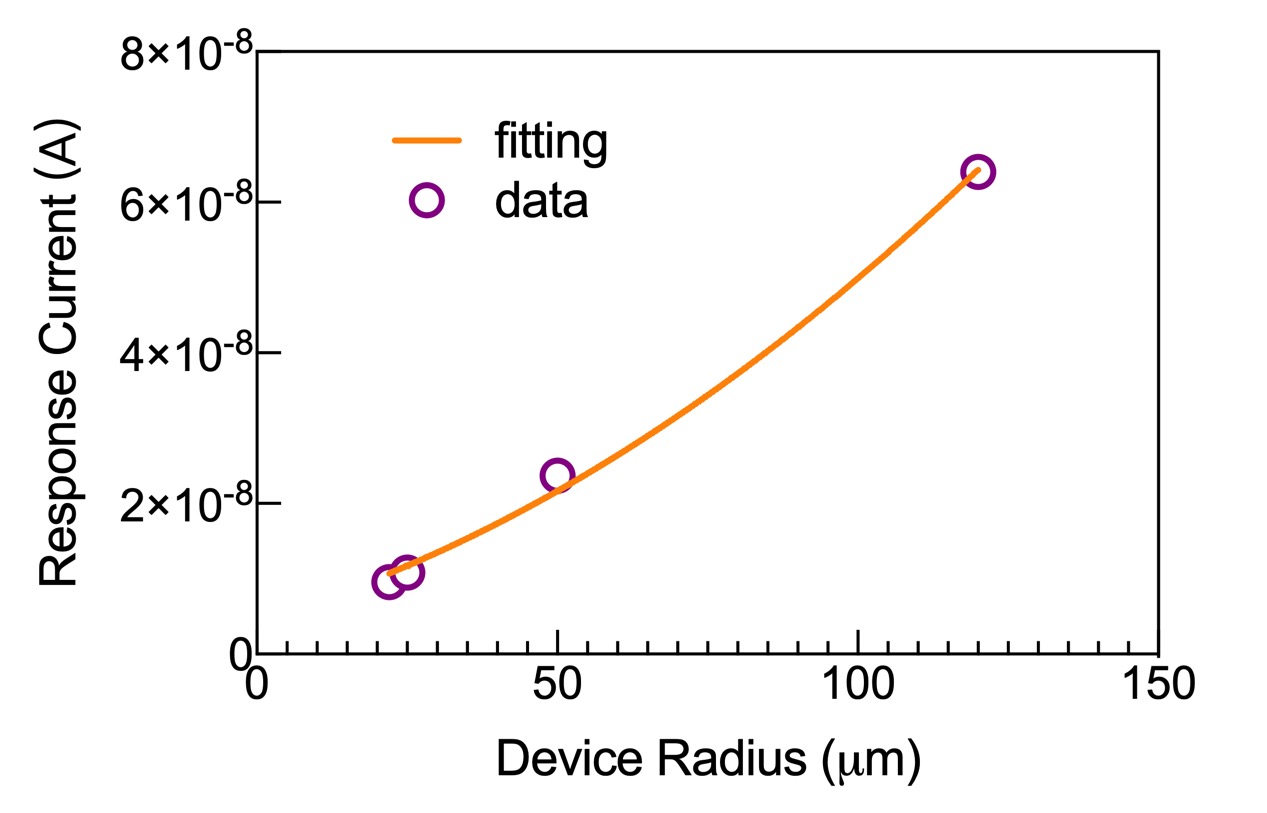


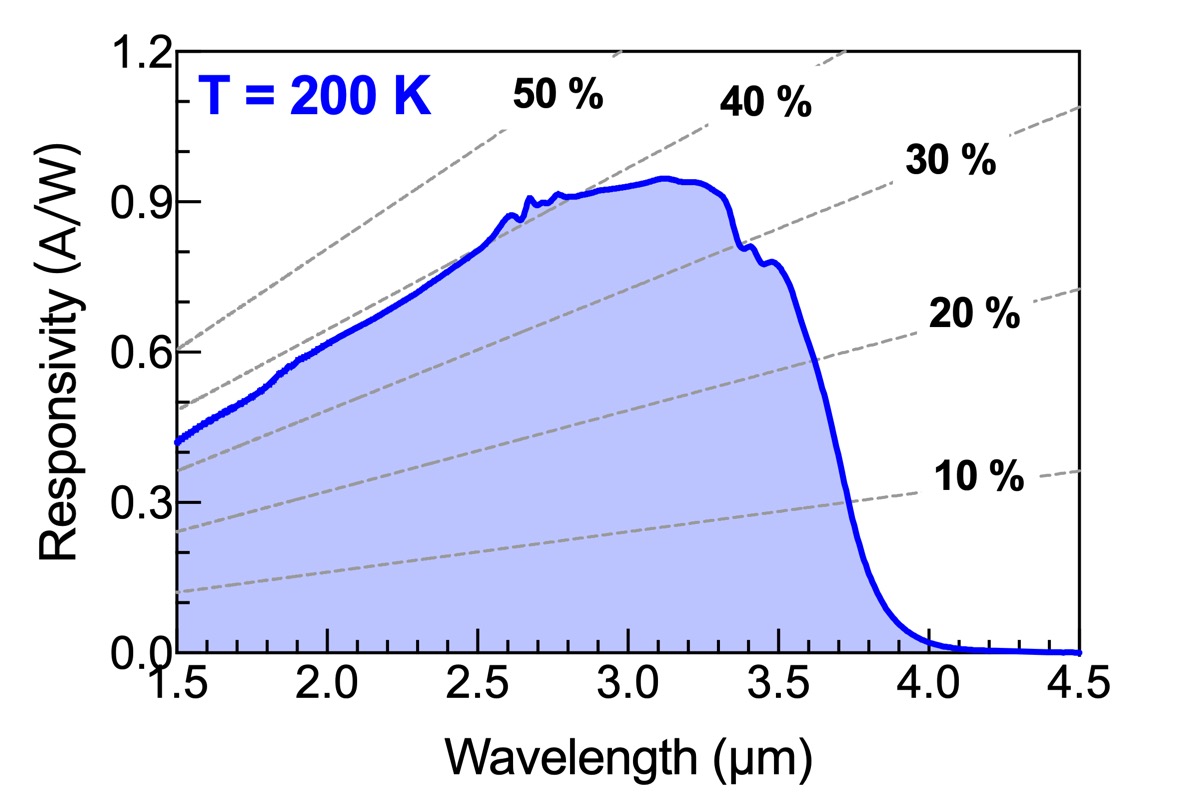


Fig. S3. (a) response photocurrent fitting of the different SFDAM APD radius for extracting lateral collection length at unit gain bias under 160 K temperature. (b) measured unity-gain external quantum efficiency and responsivity of a 100 µm × 100 µm APD device at 200 K.
